# Supplementary material for: Highly efficient catalytic/sonocatalytic reduction of 4-nitrophenol and antibacterial activity through a bifunctional Ag/ZnO nanohybrid material prepared via a sodium alginate method
Source: Royal Society of Chemistry journal article supplement (doi:10.1039/c9na00075e), 2019-01-01
Supplement: c9na00075e1.pdf [file c9na00075e1.pdf]

## Electronic supplementary material

### Highly efficient catalytic/sonocatalytic reduction of 4-nitrophenol and antibacterial activities through bifunctional Ag/ZnO nanohybrid material made-up via sodium alginate method

Hicham Abou Oualid<sup>a,b</sup>, Othmane Amadine<sup>a</sup>, Younes Essamlali<sup>a</sup>, Issam Meftah Kadmiri<sup>c</sup>, Hicham El Arroussi<sup>c</sup>, Mohamed Zahouily<sup>a,b,\*</sup>

<sup>a</sup> VARENA Center, MAScIR Foundation, Rabat Design, Rue Mohamed El Jazouli, Madinat El Irfane 10100-Rabat, Morocco.

<sup>b</sup> Laboratoire de Matériaux, Catalyse et Valorisation des Ressources Naturelles, URAC 24, FST, Université Hassan II-Casablanca BP, 146, 20650, Morocco.

<sup>c</sup> Green Biotechnology Center, Moroccan Foundation for Advanced Science, Innovation and Research, Rabat Design Center, Rabat, Morocco

\*Correspondence: [m.zahouily@mascir.com](mailto:m.zahouily@mascir.com) ; Tel. +212661416359

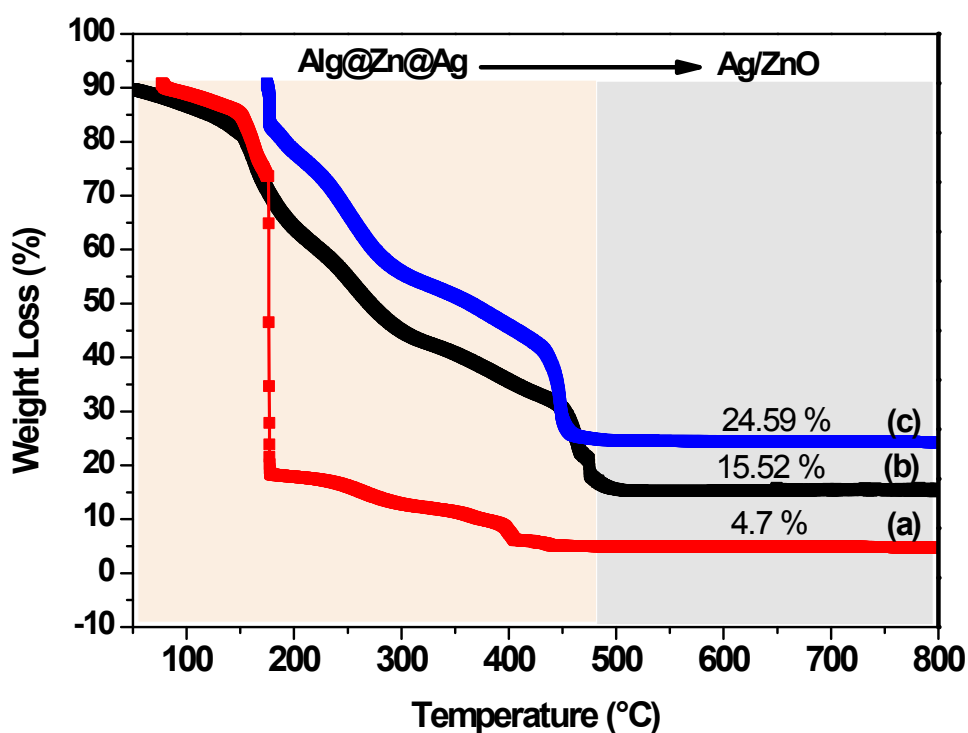

Fig. A1 : TGA of Alg@Zn@Ag1 (a), Alg@Zn@Ag2 (b) and Alg@Zn@Ag3 (c) under air.

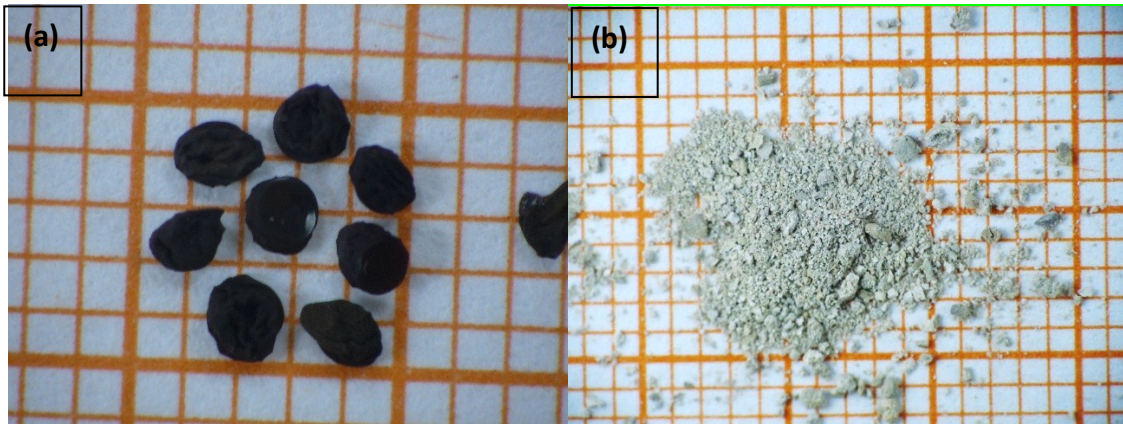

Fig. A2 : Photo of the Alg@Zn@Ag beads(a) and (b) Ag/ZnO powder.

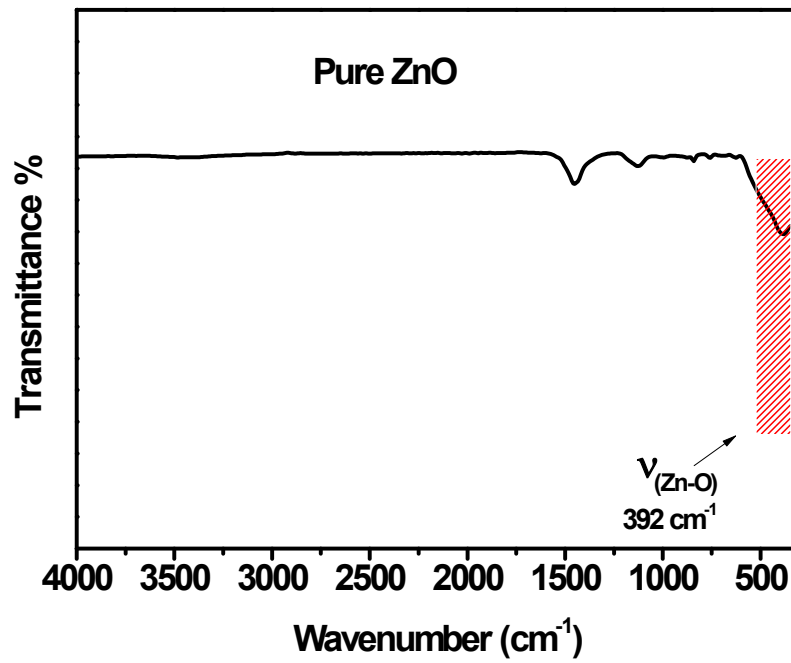

Fig. A3: FTIR analysis of pure zinc oxide fabricated by the same procedure.

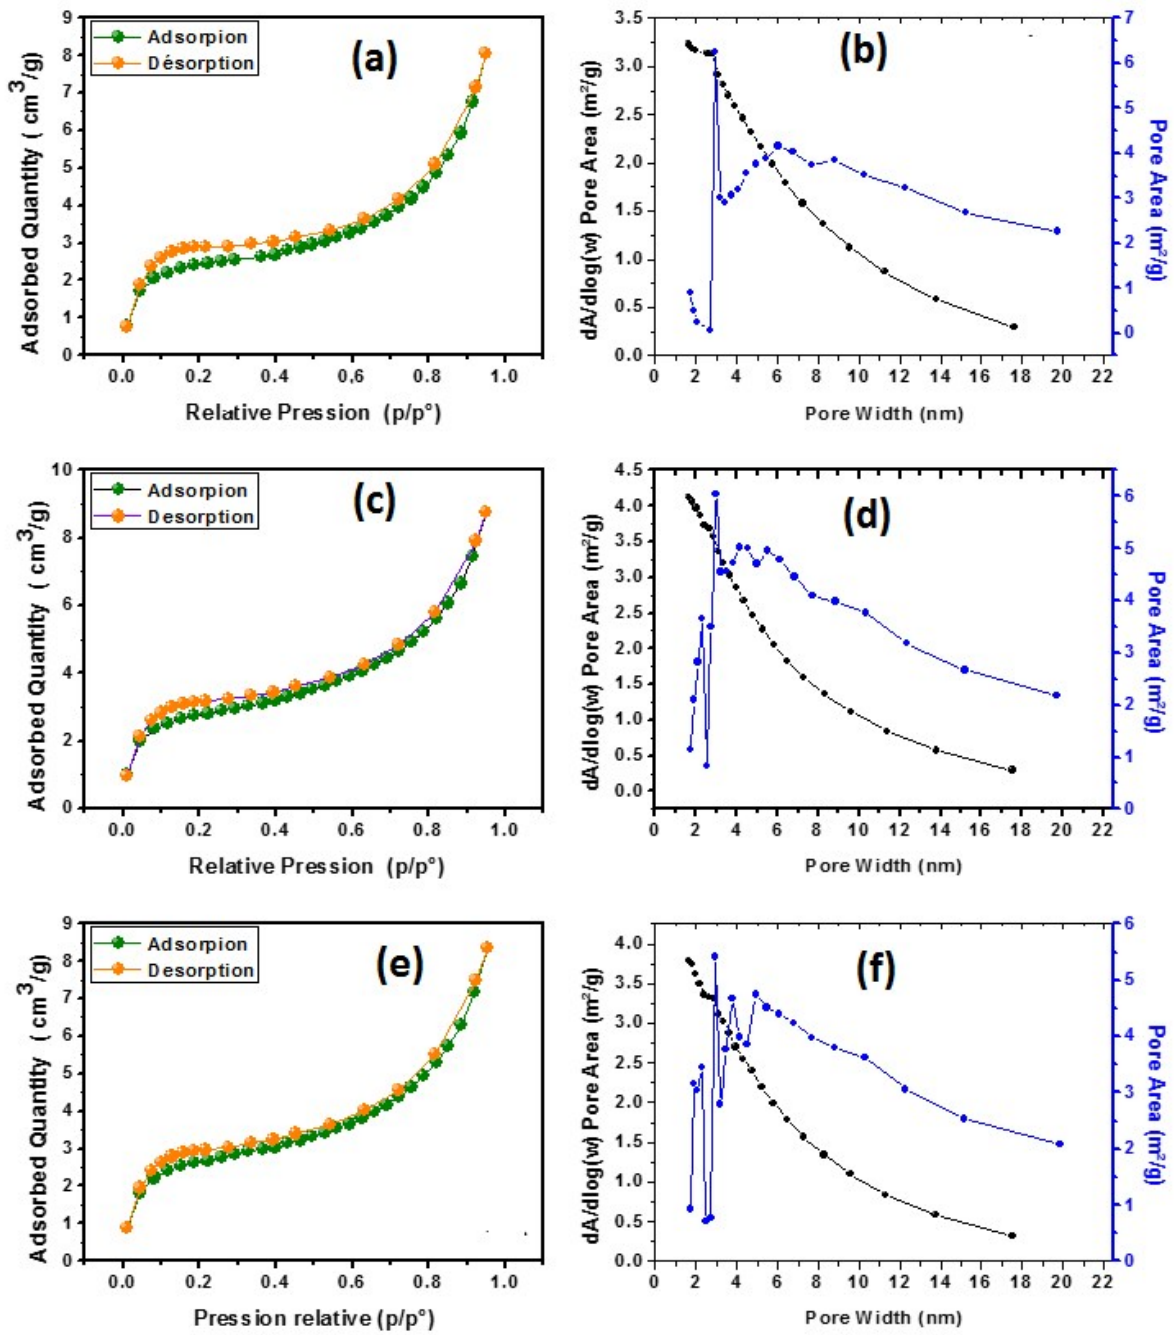

**Fig. A4:** N<sub>2</sub> adsorption-desorption (isotherms) and BJH pore size distribution of Ag<sub>0.84</sub>/ZnO (a, b), Ag<sub>1.68</sub>/ZnO (c, d) and Ag<sub>2.98</sub>/ZnO (e, f), respectively.

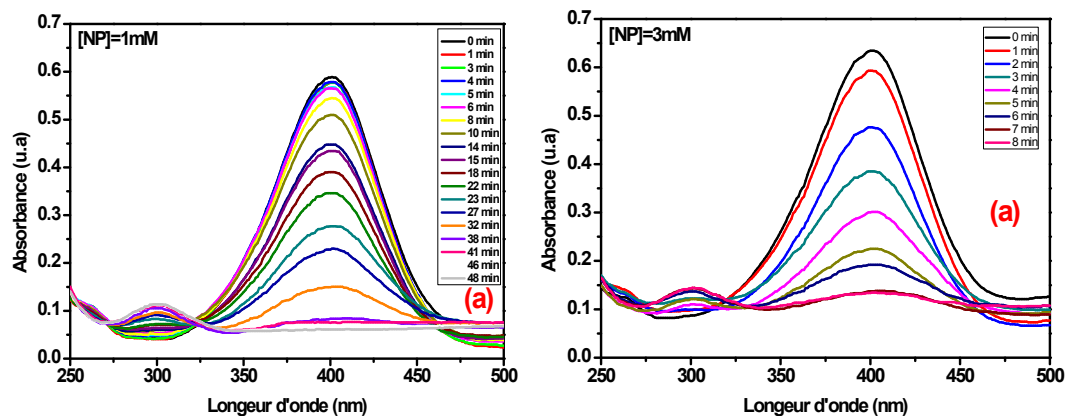

Fig. A5: UV-Vis spectra evolution of solutions of 4-NP in the presence of  $\text{NaBH}_4$  in different concentration of 4-NP.

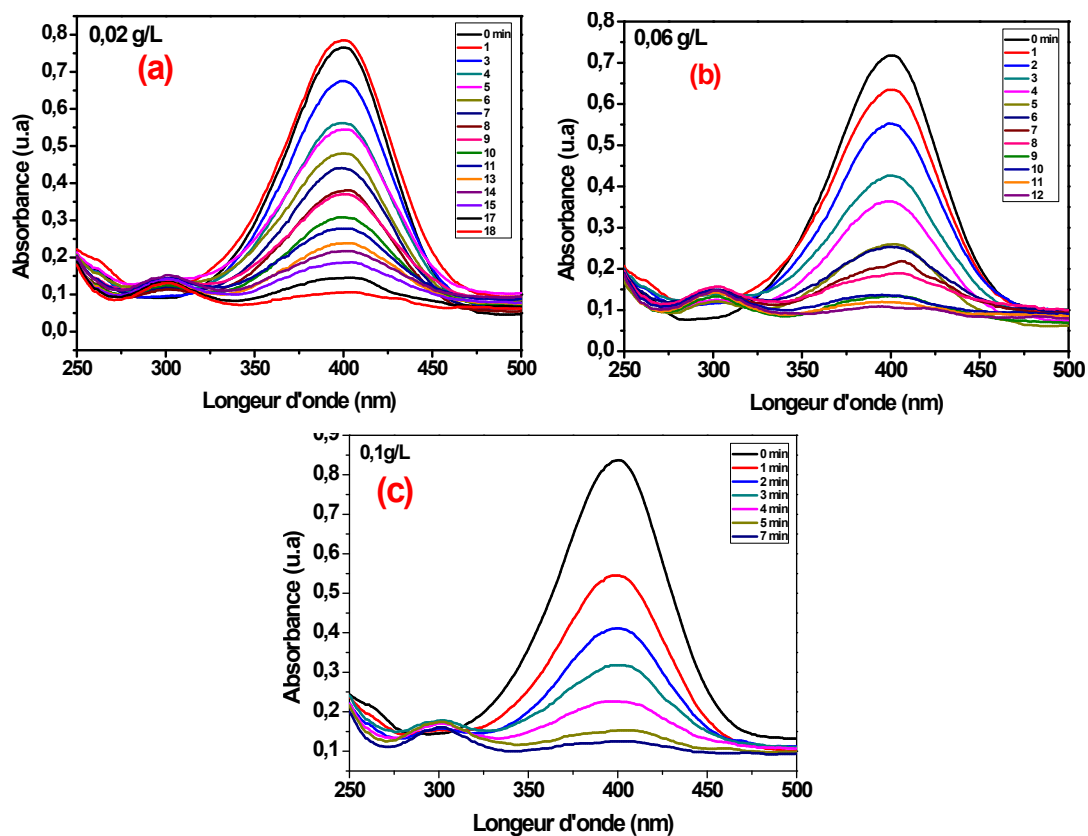

Fig. A6: UV-Vis spectra evolution of solutions of 4-NP in the presence of  $\text{NaBH}_4$  in different mass concentrations of Ag/ZnO catalyst.

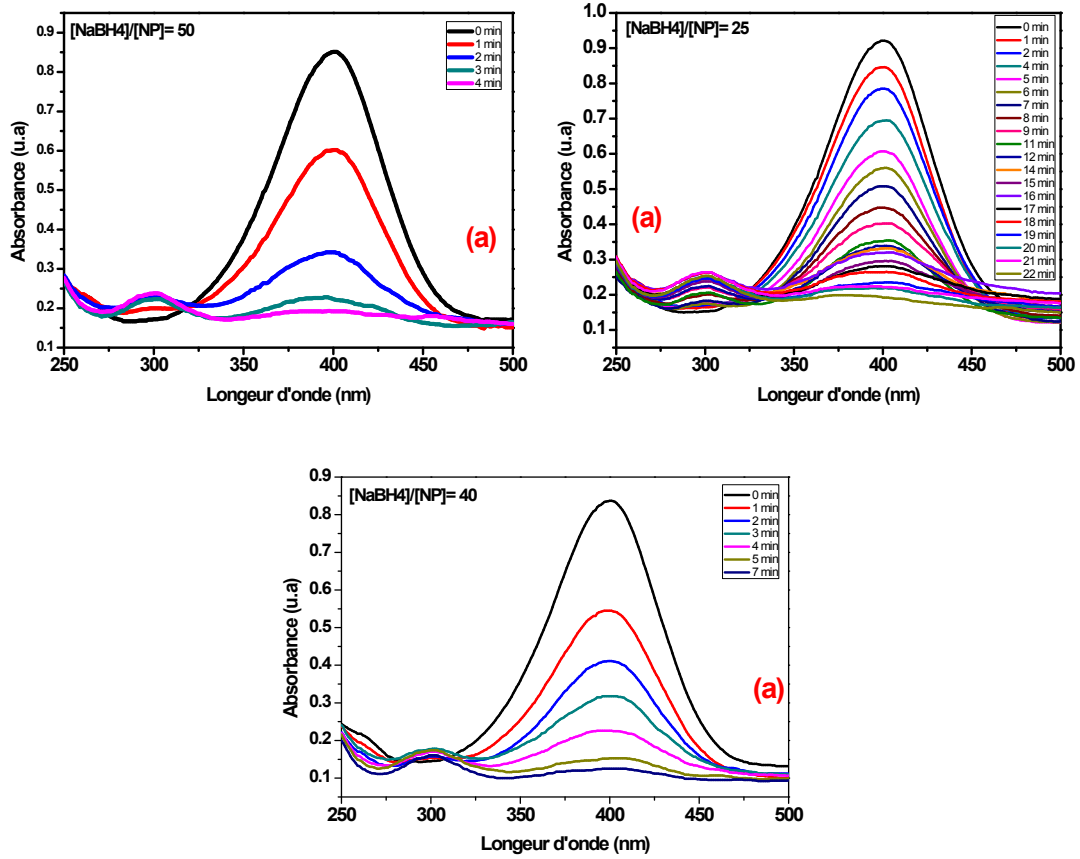

**Fig. A7:** UV-Vis spectra evolution of solutions of 4-NP in the presence of NaBH<sub>4</sub> in different R ratio.
